# Supplementary material
Source: PubMed Central journal article supplement (PMC10598633)
Supplement: peds.2023-062101SupplementaryData.pdf [file peds.2023-062101SupplementaryData.pdf]

## Supplemental Information

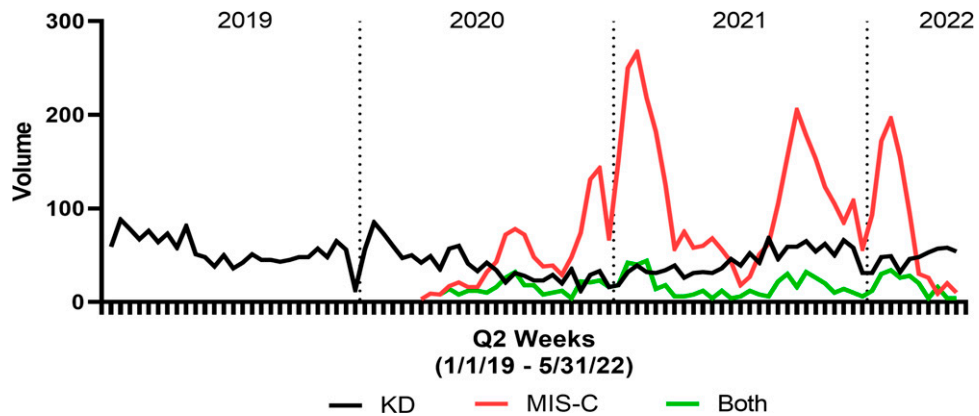

### SUPPLEMENTAL FIGURE 2

Volume of hospitalization for MIS-C, KD, and both diagnosis. Data shown every 2 weeks from January 2019 to May 2022.

### SUPPLEMENTAL TABLE 5 Algorithm for the Identification of MIS-C Hospitalizations for 2020

#### Algorithm

COVID diagnosis (U07.1) AND Other specified systemic involvement of connective tissue (M35.8) OR

[COVID diagnosis (U07.1) OR Other specified systemic involvement of connective tissue (35.8)] PLUS treatment of MIS-C, as defined by administration of either [IVIG + (either aspirin or an anticoagulant)] OR [(any of: anakinra, infliximab, tocilizumab) + (either aspirin or an anticoagulant)]

IVIG, intravenous immunoglobulin.

| <b>SUPPLEMENTAL TABLE 6</b> Patient Demographics and Clinical Characteristics of Patients With a Diagnosis of Both MIS-C and KD |                       |              |             |          |
|---------------------------------------------------------------------------------------------------------------------------------|-----------------------|--------------|-------------|----------|
|                                                                                                                                 | <b>MIS-C &amp; KD</b> | <b>MIS-C</b> | <b>KD</b>   | <b>P</b> |
| # Encounters                                                                                                                    | 914                   | 4868         | 2387        |          |
| Age                                                                                                                             |                       |              |             | <.001    |
| <1 y                                                                                                                            | 66 (7.2)              | 107 (2.2)    | 479 (20.1)  |          |
| 1–4 y                                                                                                                           | 374 (40.9)            | 911 (18.7)   | 1376 (57.6) |          |
| 5–11 y                                                                                                                          | 406 (44.4)            | 2336 (48)    | 479 (20.1)  |          |
| 12–15 y                                                                                                                         | 54 (5.9)              | 1033 (21.2)  | 39 (1.6)    |          |
| 16–20 y                                                                                                                         | 14 (1.5)              | 481 (9.9)    | 14 (0.6)    |          |
| Sex                                                                                                                             |                       |              |             | .054     |
| Female                                                                                                                          | 331 (36.2)            | 1921 (39.5)  | 974 (40.8)  |          |
| Race/ethnicity                                                                                                                  |                       |              |             | <.001    |
| Non-Hispanic White                                                                                                              | 283 (31)              | 1824 (37.5)  | 925 (38.8)  |          |
| Non-Hispanic Black                                                                                                              | 260 (28.4)            | 1372 (28.2)  | 493 (20.7)  |          |
| Hispanic                                                                                                                        | 280 (30.6)            | 1226 (25.2)  | 588 (24.6)  |          |
| Asian                                                                                                                           | 30 (3.3)              | 129 (2.6)    | 212 (8.9)   |          |
| Other                                                                                                                           | 61 (6.7)              | 317 (6.5)    | 169 (7.1)   |          |
| Payor                                                                                                                           |                       |              |             | <.001    |
| Government                                                                                                                      | 525 (57.4)            | 2577 (52.9)  | 1176 (49.3) |          |
| Private                                                                                                                         | 341 (37.3)            | 1973 (40.5)  | 1064 (44.6) |          |
| Other                                                                                                                           | 48 (5.3)              | 318 (6.5)    | 147 (6.2)   |          |
| COI                                                                                                                             |                       |              |             | .008     |
| Very low                                                                                                                        | 112 (26.6)            | 451 (22.1)   | 231 (23)    |          |
| Low                                                                                                                             | 115 (27.3)            | 480 (23.5)   | 233 (23.2)  |          |
| Moderate                                                                                                                        | 96 (22.8)             | 423 (20.7)   | 194 (19.3)  |          |
| High                                                                                                                            | 64 (15.2)             | 457 (22.4)   | 222 (22.1)  |          |
| Very high                                                                                                                       | 34 (8.1)              | 231 (11.3)   | 123 (12.3)  |          |
| No. of CCC                                                                                                                      |                       |              |             | <.001    |
| 0                                                                                                                               | 420 (46)              | 2386 (49)    | 1656 (69.4) |          |
| 1–2                                                                                                                             | 478 (52.3)            | 2255 (46.3)  | 703 (29.5)  |          |
| ≥3                                                                                                                              | 16 (1.8)              | 227 (4.7)    | 28 (1.2)    |          |
| Complex chronic condition category                                                                                              |                       |              |             |          |
| Neurologic                                                                                                                      | 4 (0.4)               | 145 (3)      | 22 (0.9)    | <.001    |
| Cardiovascular                                                                                                                  | 218 (23.9)            | 1274 (26.2)  | 166 (7)     | <.001    |
| Respiratory                                                                                                                     | 0 (0)                 | 46 (0.9)     | 6 (0.3)     | <.001    |
| Renal/urologic                                                                                                                  | 12 (1.3)              | 120 (2.5)    | 19 (0.8)    | <.001    |
| Gastrointestinal                                                                                                                | 13 (1.4)              | 252 (5.2)    | 30 (1.3)    | <.001    |
| Hematologic/immunologic                                                                                                         | 70 (7.7)              | 384 (7.9)    | 110 (4.6)   | <.001    |
| Metabolic                                                                                                                       | 315 (34.5)            | 1340 (27.5)  | 467 (19.6)  | <.001    |
| Congenital/genetic                                                                                                              | 2 (0.2)               | 80 (1.6)     | 18 (0.8)    | <.001    |
| Neonatal                                                                                                                        | 2 (0.2)               | 11 (0.2)     | 5 (0.2)     | .990     |
| Technology                                                                                                                      | 13 (1.4)              | 183 (3.8)    | 28 (1.2)    | <.001    |
| H-RISK                                                                                                                          | 4.3 (4.1)             | 5.5 (6.4)    | 2.1 (2.6)   | <.001    |
| Echocardiogram                                                                                                                  | 904 (98.9)            | 4620 (94.9)  | 2317 (97.1) | <.001    |
| Shock                                                                                                                           | 200 (21.9)            | 1883 (38.7)  | 122 (5.1)   | <.001    |
| ECMO                                                                                                                            | 4 (0.4)               | 69 (1.4)     | 2 (0.1)     | <.001    |
| Epinephrine                                                                                                                     | 166 (18.2)            | 1526 (31.3)  | 72 (3)      | <.001    |
| Norepinephrine                                                                                                                  | 86 (9.4)              | 802 (16.5)   | 30 (1.3)    | <.001    |
| Phenylephrine                                                                                                                   | 9 (1)                 | 91 (1.9)     | 27 (1.1)    | .019     |
| Dopamine                                                                                                                        | 2 (0.2)               | 85 (1.7)     | 18 (0.8)    | <.001    |
| Dobutamine                                                                                                                      | 2 (0.2)               | 21 (0.4)     | 0 (0)       | .005     |
| Vasopressin                                                                                                                     | 17 (1.9)              | 134 (2.8)    | 6 (0.3)     | <.001    |
| Milrinone                                                                                                                       | 50 (5.5)              | 586 (12)     | 12 (0.5)    | <.001    |
| Death                                                                                                                           | 0 (0)                 | 43 (0.9)     | 0 (0)       | <.001    |

Data are presented as *n* (%) with the exception of H-RISK, which is presented as mean (standard deviation).
